# Supplementary material for: Supercritical Fluid Extraction and Chromatography of Lipids in Bilberry
Source: PubMed Central journal article supplement (PMC4522036; doi:10.1007/s11746-015-2680-x), 2015-07-11
Supplement: 11746_2015_2680_MOESM1_ESM.pdf [file 11746_2015_2680_MOESM1_ESM.pdf]

## Supporting Information

### Supercritical Fluid Extraction and Chromatography of Lipids in Bilberry

Firas Jumaah, Margareta Sandahl and Charlotta Turner

#### Content:

**Table S1.** Experimental design of CCD with experimental and predicted values of total lipid and FAMES extracts of each run.

**Figure S2.** Central composite design (CCD) plot for the SFE optimization showing the effects of pressure, temperature and time on extracted amount of total lipids (mg per g of freeze-dried bilberry).

**Figure S3.** Central composite design (CCD) plot for the SFE optimization showing the effects of pressure, temperature and time on extracted amount of FAMES (mg per g of freeze-dried bilberry).

**Table S4.** ANOVA for the fitted quadratic polynomial model for SFE of total lipids.

**Table S5.** ANOVA for the fitted quadratic polynomial model for SFE of FAMES.

**Table S6.** Estimated regression model of relationship between the total lipid and independent variables (P, T, and t).

**Table S7.** Estimated regression model of relationship between the FAMES and independent variables (P, T, and t).

**Figure S8.** Main effects and interaction effects for pressure (x1), temperature (x2) and time (x3) on the extracted amount of total lipids (mg per g of freeze-dried bilberry).

**Table S9.** Lipids identified in positive mode for the SFE extracts.

**Table S10.** Lipids identified in negative mode for the SFE extracts.

**Figure S11.** MS spectra of a triacylglycerol (S-L-O) with fragmentation ions of diacylglycerols (O-L, S-L, S-O) in bilberry extracts. Abbreviations: S-stearic acid; O - oleic acid; L - linoleic acid.

**Figure S12.** MS spectra of sitosterol esters: 18:0-sitosterol (top spectra), (B) 18:1-sitosterol (mid spectra), and 18:2-sitosterol (bottom spectra) in bilberry extract.

**Figure S13.** MS spectra of phosphatidylcholine (16:0/18:2) in bilberry extract.

**Figure S14.** MS spectra of lutein in bilberry extract.

**Table S1.** Experimental design of CCD with experimental and predicted values of total lipid and FAMES extracts of each run.

| Run | P (bar) | T (°C) | t (min) | mg/g freeze-dried sample |           |              |           |
|-----|---------|--------|---------|--------------------------|-----------|--------------|-----------|
|     |         |        |         | Total lipids             |           | FAMES        |           |
|     |         |        |         | Experimental             | Predicted | Experimental | Predicted |
| 1   | 250     | 40     | 20      | 13.5                     | 16.7      | 1.75         | 1.74      |
| 2   | 250     | 40     | 60      | 30.6                     | 34.7      | 2.91         | 2.32      |
| 3   | 250     | 60     | 20      | 22.7                     | 24.0      | 1.47         | 1.35      |
| 4   | 250     | 60     | 60      | 38.3                     | 40.8      | 4.83         | 4.84      |
| 5   | 450     | 40     | 20      | 26.4                     | 25.6      | 0.46         | 0.66      |
| 6   | 450     | 40     | 60      | 36.8                     | 37.2      | 2.44         | 2.51      |
| 7   | 450     | 60     | 60      | 54.4                     | 52.9      | 1.91         | 2.01      |
| 8   | 450     | 60     | 20      | 45.0                     | 42.6      | 0.27         | 0.94      |
| 9   | 250     | 50     | 40      | 39.9                     | 28.7      | 2.02         | 2.73      |
| 10  | 450     | 50     | 40      | 34.8                     | 39.2      | 2.73         | 1.70      |
| 11  | 350     | 40     | 40      | 42.9                     | 36.1      | 0.96         | 1.30      |
| 12  | 350     | 60     | 40      | 47.5                     | 47.6      | 2.44         | 1.78      |
| 13  | 350     | 50     | 20      | 15.6                     | 14.3      | 1.98         | 1.38      |
| 14  | 350     | 50     | 60      | 34.0                     | 28.5      | 1.92         | 2.20      |
| 15  | 350     | 50     | 40      | 29.0                     | 31.5      | 1.32         | 1.75      |
| 16  | 350     | 50     | 40      | 21.3                     | 31.5      | 0.47         | 1.75      |
| 17  | 350     | 50     | 40      | 35.5                     | 31.5      | 2.04         | 1.75      |
| 18  | 350     | 50     | 40      | 26.5                     | 31.5      | 2.53         | 1.75      |

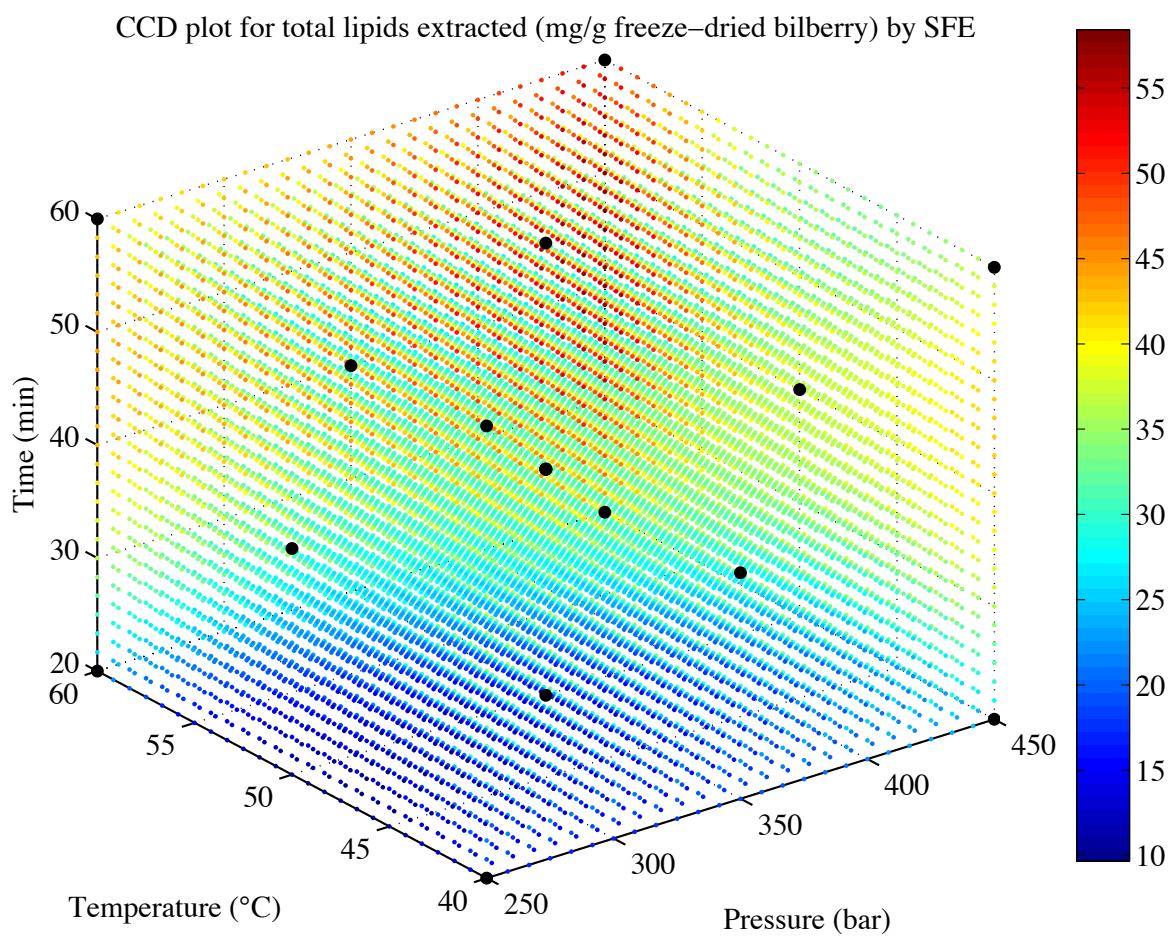

**Figure S2.** Central composite design (CCD) plot for the SFE optimization showing the effects of pressure, temperature and time on extracted amount of total lipids (mg per g of freeze-dried bilberry).

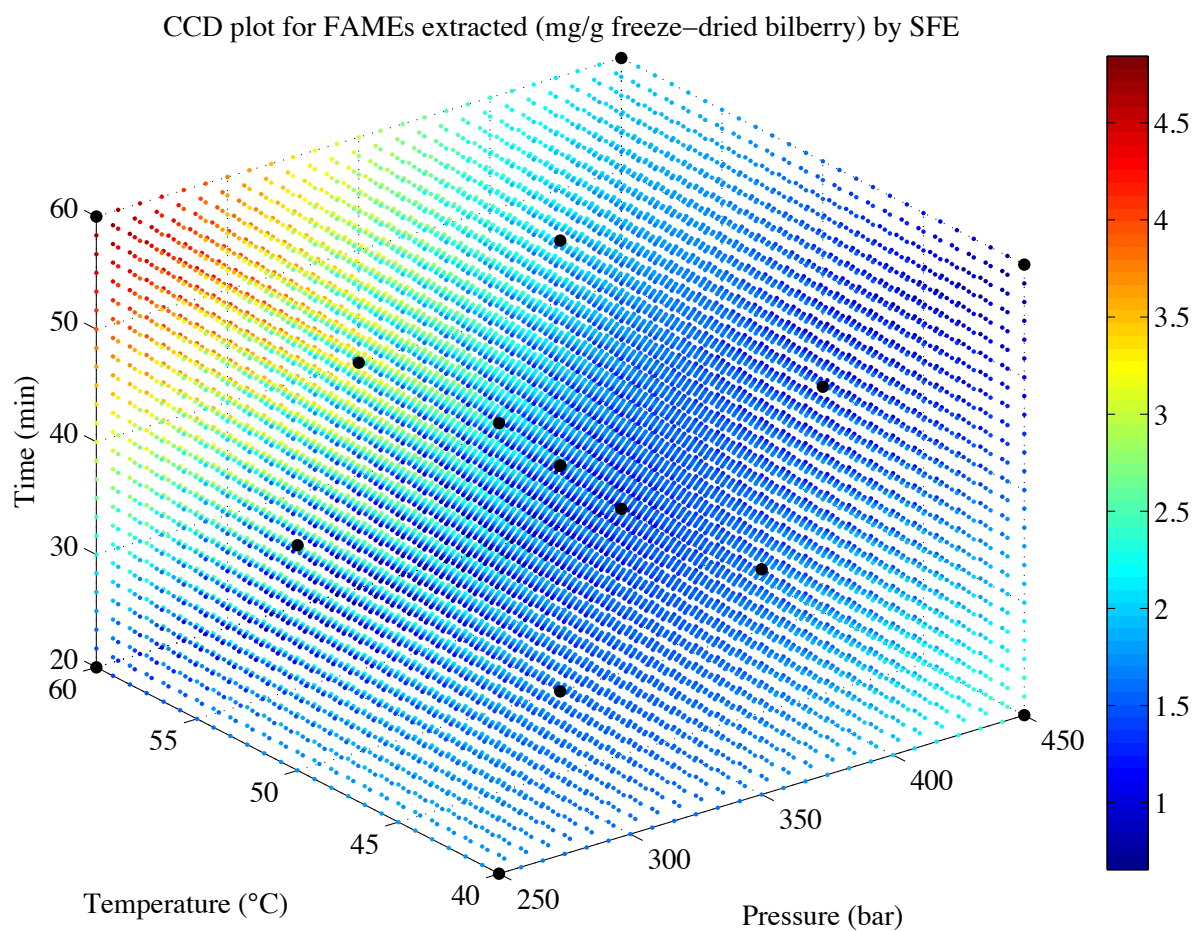

**Figure S3.** Central composite design (CCD) plot for the SFE optimization showing the effects of pressure, temperature and time on extracted amount of FAMEs (mg per g of freeze-dried bilberry).

**Table S4.** ANOVA for the fitted quadratic polynomial model for SFE of total lipids.

|                         | Sum of squares | Degree of freedom | Mean of square | F-value | p-value  |
|-------------------------|----------------|-------------------|----------------|---------|----------|
| Total                   | 2044.4         | 17                | 120.26         |         |          |
| Model                   | 1627.2         | 9                 | 180.8          | 3.4669  | 0.047054 |
| Linear                  | 1110.2         | 3                 | 370.06         | 7.0962  | 0.012105 |
| Nonlinear               | 517            | 6                 | 86.167         | 1.6523  | 0.24964  |
| Residual                | 417.2          | 8                 | 52.15          |         |          |
| Lack of fit             | 312.83         | 5                 | 62.566         | 1.7984  | 0.3336   |
| Pure error              | 104.37         | 3                 | 34.789         |         |          |
| R <sup>2</sup>          | 0.80           |                   |                |         |          |
| Adjusted R <sup>2</sup> | 0.57           |                   |                |         |          |

**Table S5.** ANOVA for the fitted quadratic polynomial model for SFE of FAMES.

|                         | Sum of squares | Degree of freedom | Mean of square | F-value | p-value |
|-------------------------|----------------|-------------------|----------------|---------|---------|
| Total                   | 19.514         | 17                | 1.148          |         |         |
| Model                   | 11.744         | 9                 | 1.305          | 1.343   | 0.344   |
| Linear                  | 9.778          | 3                 | 3.259          | 3.356   | 0.076   |
| Nonlinear               | 1.966          | 6                 | 0.328          | 0.337   | 0.899   |
| Residual                | 7.770          | 8                 | 0.971          |         |         |
| Lack of fit             | 5.357          | 5                 | 1.071          | 1.332   | 0.433   |
| Pure error              | 2.413          | 3                 | 0.804          |         |         |
| R <sup>2</sup>          | 0.60           |                   |                |         |         |
| Adjusted R <sup>2</sup> | 0.15           |                   |                |         |         |

**Table S6.** Estimated regression model of relationship between the total lipid and independent variables (P, T, and t). Second order polynomial equation:  $y = 0.00175 - 0.0108P + 0.19175T - 0.0630t - 0.0003PT - 0.0003Pt + 0.00364Tt + 0.00005P^2 - 0.0021T^2 + 0.0001t^2$ , where y is the total amount of total lipids (mg/g) extracted from freeze-dried bilberry. P, T, and t are pressure, temperature and dynamic extraction time, respectively.

|                | Sum of squares | Degree of freedom | Mean of square | F-value  | p-value  |
|----------------|----------------|-------------------|----------------|----------|----------|
| P              | 274.58         | 1                 | 274.58         | 5.2652   | 0.050898 |
| T              | 332.93         | 1                 | 332.93         | 6.3841   | 0.035438 |
| t              | 502.68         | 1                 | 502.68         | 9.6392   | 0.014562 |
| PT             | 46.561         | 1                 | 46.561         | 0.89284  | 0.37237  |
| Pt             | 20.801         | 1                 | 20.801         | 0.39888  | 0.54529  |
| Tt             | 0.78125        | 1                 | 0.78125        | 0.014981 | 0.9056   |
| P <sup>2</sup> | 17.178         | 1                 | 17.178         | 0.3294   | 0.58178  |
| T <sup>2</sup> | 291.27         | 1                 | 291.27         | 5.5853   | 0.045721 |
| t <sup>2</sup> | 272.71         | 1                 | 272.71         | 5.2294   | 0.051522 |
| Error          | 417.2          | 8                 | 52.15          |          |          |

**Table S7.** Estimated regression model of relationship between the FAMEs and independent variables (P, T, and t).

|                | Sum of squares | Degree of freedom | Mean of square | F-value | p-value |
|----------------|----------------|-------------------|----------------|---------|---------|
| P              | 2.673          | 1                 | 2.673          | 2.752   | 0.136   |
| T              | 0.576          | 1                 | 0.576          | 0.593   | 0.463   |
| t              | 6.527          | 1                 | 6.527          | 6.722   | 0.032   |
| PT             | 0.696          | 1                 | 0.696          | 0.717   | 0.422   |
| Pt             | 0.101          | 1                 | 0.101          | 0.104   | 0.755   |
| Tt             | 0.432          | 1                 | 0.432          | 0.445   | 0.523   |
| P <sup>2</sup> | 0.586          | 1                 | 0.586          | 0.603   | 0.460   |
| T <sup>2</sup> | 0.119          | 1                 | 0.119          | 0.123   | 0.735   |
| t <sup>2</sup> | 0.004          | 1                 | 0.004          | 0.004   | 0.948   |
| Error          | 7.770          | 8                 | 0.971          |         |         |

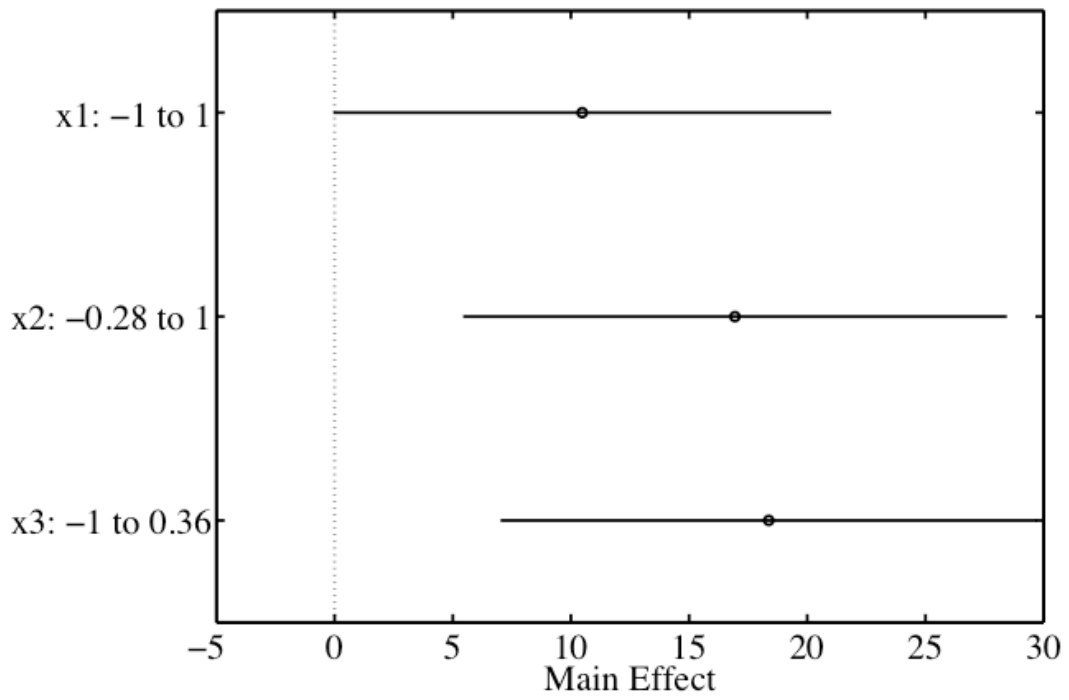

**Figure S8 A.** The main effects of pressure (x1), temperature (x2) and time (x3) on the extracted amount of total lipids (mg per g of freeze-dried bilberry).

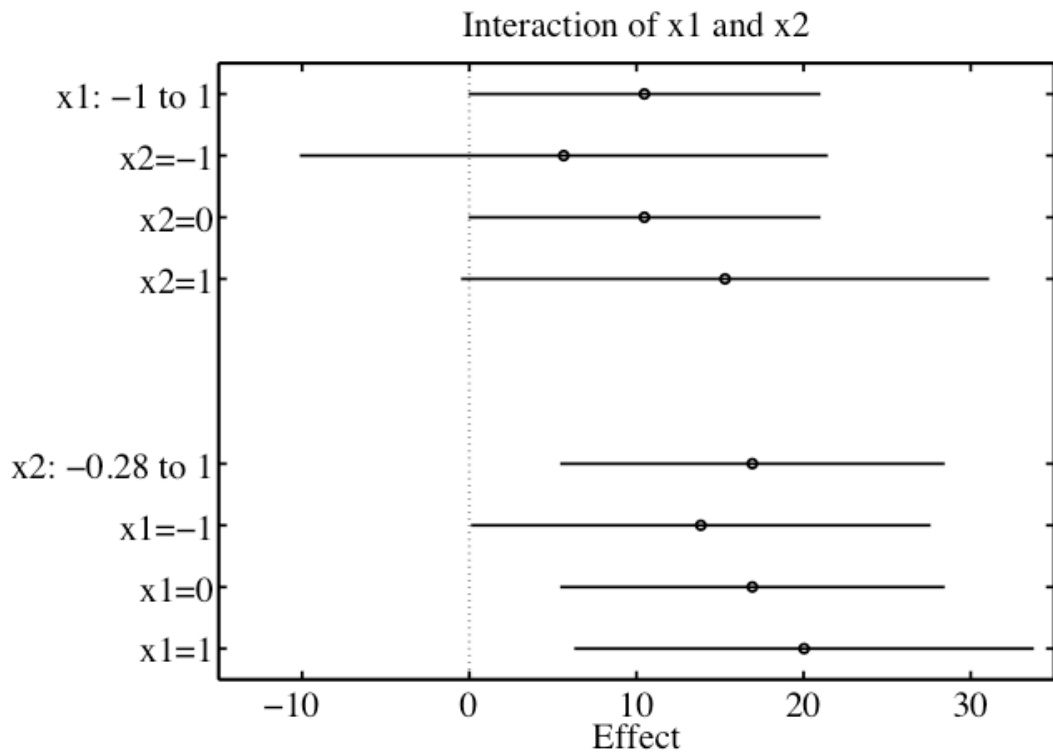

**Figure S8 B.** The interaction effects of pressure (x1) and temperature (x2) on the extracted amount of total lipids (mg per g of freeze-dried bilberry).



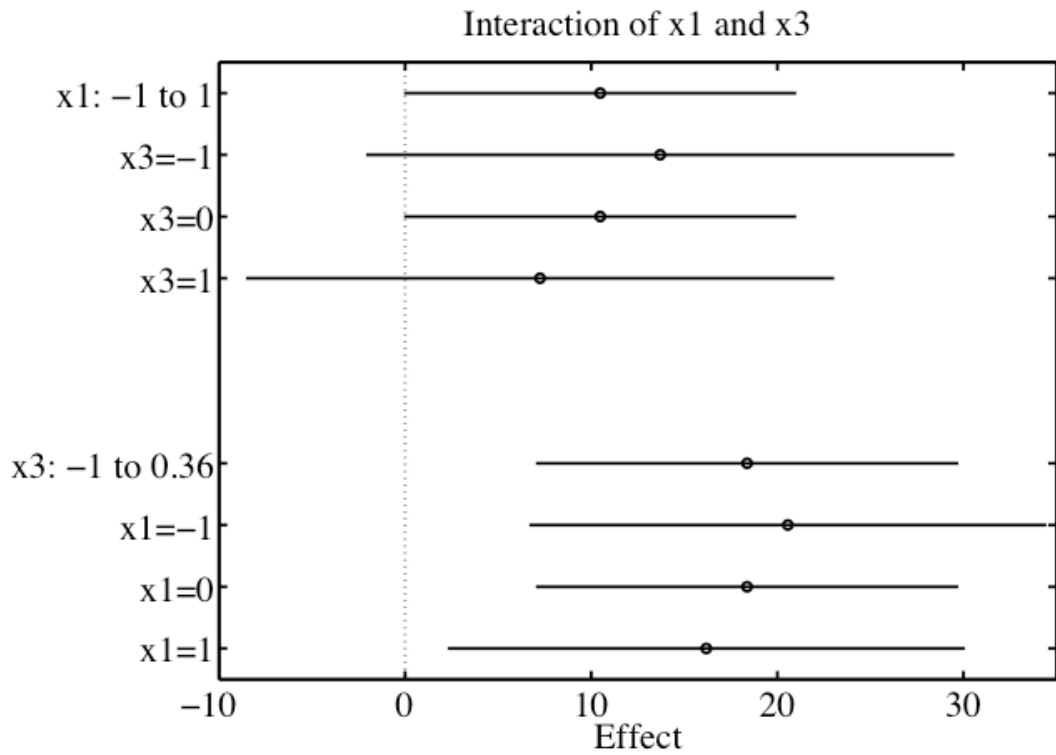

**Figure S8 C.** The interaction effects of pressure (x1) and time (x3) on the extracted amount of total lipids (mg per g of freeze-dried bilberry).

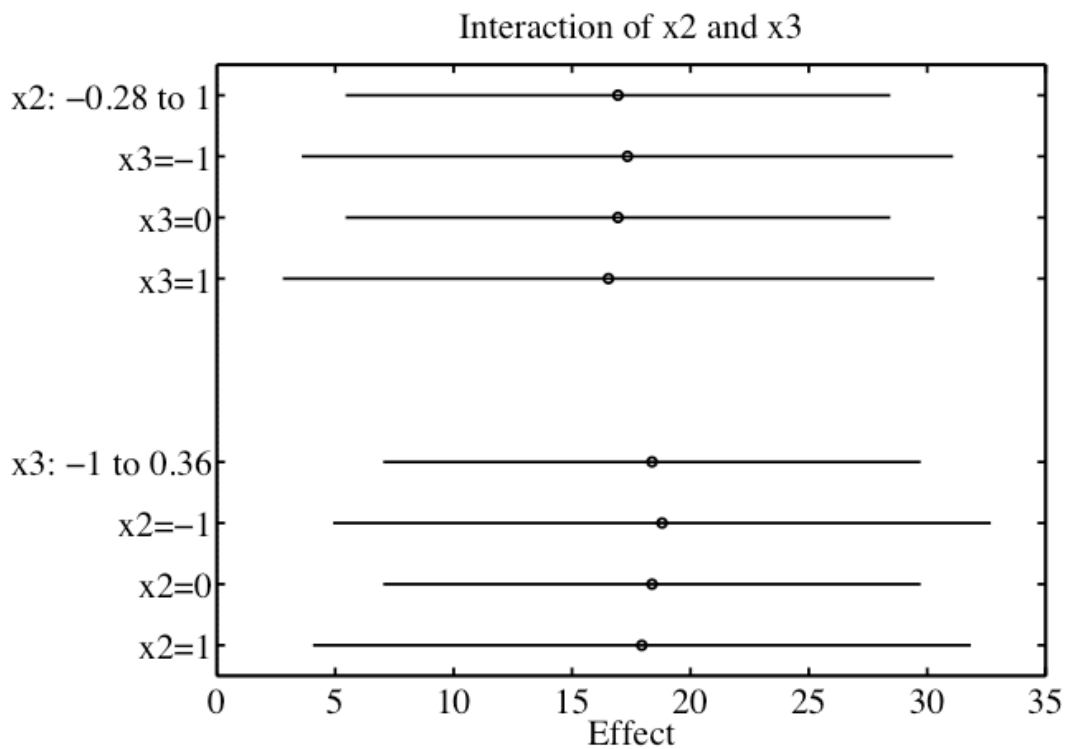

**Figure S8 D.** The main effects of pressure (x1), temperature (x2) and time (x3) on the extracted amount of total lipids (mg per g of freeze-dried bilberry).

**Table S9.** Lipids identified in positive mode for the SFE extracts.

| RT (min) | Observed main m/z | Adduct type                          | Formula    | Tentative compound class |
|----------|-------------------|--------------------------------------|------------|--------------------------|
| 1.027    | 391.2853          | [M+H] <sup>+</sup>                   | C24H38O4   | Dioctyl phathate         |
| 1.643    | 437.4343          | [M+H] <sup>+</sup>                   | C29H56O2   | WE 29:1                  |
| 1.842    | 465.4654          | [M+H] <sup>+</sup>                   | C31H60O2   | WE 31:1                  |
| 2.276    | 449.4701          | [M+H] <sup>+</sup>                   | C30H56O2   | WE 30:2                  |
| 3.168    | 890.7304          | [M+NH <sub>4</sub> ] <sup>+</sup>    | C56H103O6  | TAG 53:2                 |
| 3.284    | 892.7424          | [M+NH <sub>4</sub> ] <sup>+</sup>    | C56H105O6  | TAG 53:1                 |
| 3.438    | 894.7565          | [M+NH <sub>4</sub> ] <sup>+</sup>    | C57H99O6   | TAG 54:7                 |
| 3.575    | 896.773           | [M+NH <sub>4</sub> ] <sup>+</sup>    | C57H101O6  | TAG 54:6                 |
| 3.74     | 898.7856          | [M+NH <sub>4</sub> ] <sup>+</sup>    | C57H103O6  | TAG 54:5                 |
| 3.924    | 900.8005          | [M+NH <sub>4</sub> ] <sup>+</sup>    | C57H105O6  | TAG 54:4                 |
| 4.141    | 902.8176          | [M+NH <sub>4</sub> ] <sup>+</sup>    | C56H107O6  | TAG 54:3                 |
| 4.295    | 666.601           | [M+NH <sub>4</sub> ] <sup>+</sup>    | C45H76O2   | 18:2-Cholesterol         |
| 5.033    | 678.6305          | [M+NH <sub>4</sub> ] <sup>+</sup>    | C46H76O2   | 18:3-campesterol         |
| 5.196    | 680.6325          | [M+NH <sub>4</sub> ] <sup>+</sup>    | C46H78O2   | 18:2-campesterol         |
| 5.276    | 692.6365          | [M+NH <sub>4</sub> ] <sup>+</sup>    | C47H78O2   | 18:3-sitosterol          |
| 5.497    | 694.6525          | [M+NH <sub>4</sub> ] <sup>+</sup>    | C47H80O2   | 18:2-sitosterol          |
| 5.812    | 696.6629          | [M+NH <sub>4</sub> ] <sup>+</sup>    | C47H82O2   | 18:1-sitosterol          |
| 7.438    | 613.4826          | [M+Na] <sup>+</sup>                  | C37H66O5   | DAG 34:3                 |
| 7.49     | 615.4979          | [M+Na] <sup>+</sup>                  | C37H68O5   | DAG 34:2                 |
| 7.562    | 617.5166          | [M+Na] <sup>+</sup>                  | C37H70O5   | DAG 34:1                 |
| 7.948    | 736.5349          | [M+H-2H <sub>2</sub> O] <sup>+</sup> | C42H78NO9P | PS 36:2                  |
| 8.001    | 554.516           | [M+NH <sub>4</sub> ] <sup>+</sup>    | C40H56     | <i>β</i> -carotene       |
| 8.38     | 654.6005          | [M+NH <sub>4</sub> ] <sup>+</sup>    | C40H76O5   | DAG 37:1                 |
| 8.537    | 682.6321          | [M+NH <sub>4</sub> ] <sup>+</sup>    | C42H80O5   | DAG 39:1                 |
| 8.613    | 696.652           | [M+NH <sub>4</sub> ] <sup>+</sup>    | C43H82O5   | DAG 40:1                 |
| 8.657    | 710.6835          | [M+NH <sub>4</sub> ] <sup>+</sup>    | C48H84O2   | 20:1-campesterol         |
| 8.946    | 568.4277          | [M] <sup>+</sup>                     | C40H52O2   | Lutein                   |
| 9.372    | 840.6769          | [M+NH <sub>4</sub> ] <sup>+</sup>    | C52H86O7   | 18:3-Glc-campesterol     |
| 9.422    | 854.6882          | [M+NH <sub>4</sub> ] <sup>+</sup>    | C53H88O7   | 18:3-Glc-sitosterol      |
| 9.452    | 842.6851          | [M+NH <sub>4</sub> ] <sup>+</sup>    | C52H88O7   | 18:2-Glc-campesterol     |
| 9.528    | 856.701           | [M+NH <sub>4</sub> ] <sup>+</sup>    | C53H90O7   | 18:2-Glc-sitosterol      |
| 9.72     | 858.7102          | [M+NH <sub>4</sub> ] <sup>+</sup>    | C53H92O7   | 18:1-Glc-sitosterol      |
| 9.741    | 931.594           | [M+H-2H <sub>2</sub> O] <sup>+</sup> | C53H91O13P | PI 44:6                  |
| 10.038   | 860               | [M+NH <sub>4</sub> ] <sup>+</sup>    | C53H94O7   | 18:0- Glc-sitosterol     |
| 10.327   | 888.7635          | [M+NH <sub>4</sub> ] <sup>+</sup>    | C55H98O7   | 20:0-Glc-sitosterol      |
| 10.667   | 916.7946          | [M+NH <sub>4</sub> ] <sup>+</sup>    | C57H102O7  | 22:0-Glc-sitosterol      |
| 10.73    | 885.5551          | [M+H] <sup>+</sup>                   | C47H81O13P | PI 38:5                  |
| 11.167   | 871.5761          | [M+H] <sup>+</sup>                   | C47H83O12P | PI 38:4                  |
| 12.827   | 780.5572          | [M+H] <sup>+</sup>                   | C44H78NO8P | PC 36:5                  |
| 12.926   | 782.5724          | [M+H] <sup>+</sup>                   | C44H80NO8P | PC 36:4                  |
| 13.134   | 758.5724          | [M+H] <sup>+</sup>                   | C42H80NO8P | PC 34:2                  |
| 13.58    | 786.6012          | [M+H] <sup>+</sup>                   | C44H84NO8P | PC 36:2                  |
| 13.75    | 784.5871          | [M+H] <sup>+</sup>                   | C44H82NO8P | PC 36:3                  |

**Table S10.** Lipids identified in negative mode for the SFE extracts.

| RT (min) | Observed main m/z | Adduct type        | Formula     | Tentative compound class |
|----------|-------------------|--------------------|-------------|--------------------------|
| 1.648    | 435.4289          | [M-H] <sup>-</sup> | C29H56O2    | WE 29:1                  |
| 1.724    | 277.2245          | [M-H] <sup>-</sup> | C18H30O2    | FA 18:3                  |
| 1.778    | 279.239           | [M-H] <sup>-</sup> | C18H32O2    | FA 18:2                  |
| 1.84     | 463.4628          | [M-H] <sup>-</sup> | C31H60O2    | WE 31:1                  |
| 2.082    | 283.2691          | [M-H] <sup>-</sup> | C18H34O2    | FA 18:0                  |
| 2.399    | 311.3035          | [M-H] <sup>-</sup> | C20H40O2    | FA 20:0                  |
| 3.152    | 367.3677          | [M-H] <sup>-</sup> | C24H47O2    | FA 24:0                  |
| 3.598    | 395.3966          | [M-H] <sup>-</sup> | C26H51O2    | FA 26:0                  |
| 3.704    | 263.1345          | -                  | -           | Unknown                  |
| 4.031    | 423.43            | [M-H] <sup>-</sup> | C28H55O2    | FA 28:0                  |
| 4.234    | 437.4464          | [M-H] <sup>-</sup> | C29H57O2    | FA 29:0                  |
| 4.366    | 451.4644          | -                  | -           | Unknown                  |
| 5.103    | 479.4944          | -                  | -           | Unknown                  |
| 6.575    | 455.3676          | [M-H] <sup>-</sup> | C20H41O9P   | LPG 14:0                 |
| 7.787    | 471.3622          | -                  | -           | Unknown                  |
| 7.83     | 730.5461          | [M-H] <sup>-</sup> | C40H78NO8P  | PE 35:1                  |
| 7.931    | 758.5636          | [M-H] <sup>-</sup> | C40H78NO10P | PS 34:2                  |
| 8.275    | 832.6418          | [M-H] <sup>-</sup> | C45H88NO10P | PS 39:0                  |
| 8.397    | 531.4583          | -                  | -           | Unknown                  |
| 8.73     | 621.4544          | -                  | -           | Unknown                  |
| 9.182    | 736.5099          | [M-H] <sup>-</sup> | C41H72NO8P  | PE 36:5                  |
| 9.227    | 738.53            | [M-H] <sup>-</sup> | C39H72NO8P  | PE 34:3                  |
| 9.297    | 714.524           | [M-H] <sup>-</sup> | C39H74NO8P  | PE 34:2                  |

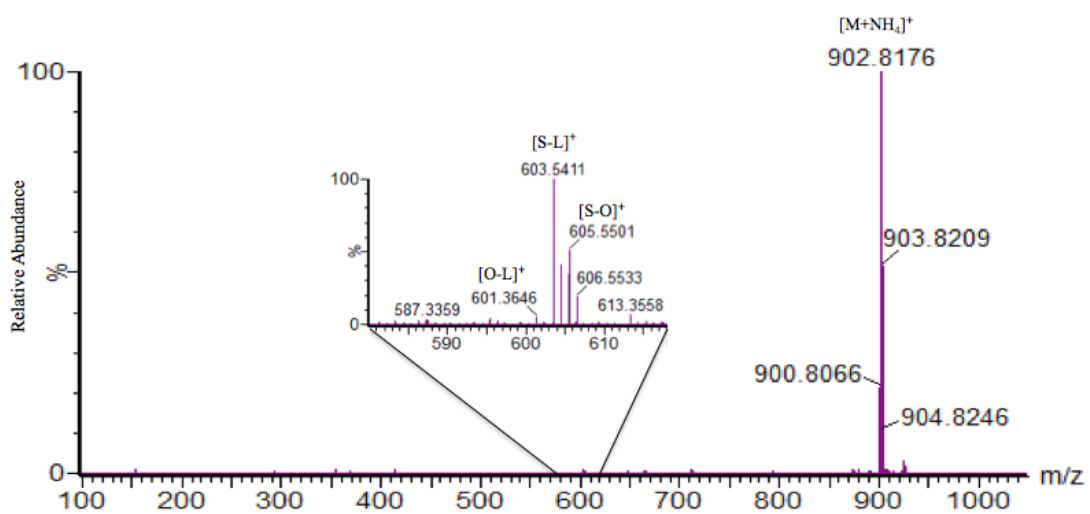

**Figure S11.** MS spectra of a triacylglycerol (S-L-O) with fragmentation ions of diacylglycerols (O-L, S-L, S-O) in bilberry extracts. Abbreviations: S-stearic acid; O - oleic acid; L - linoleic acid.

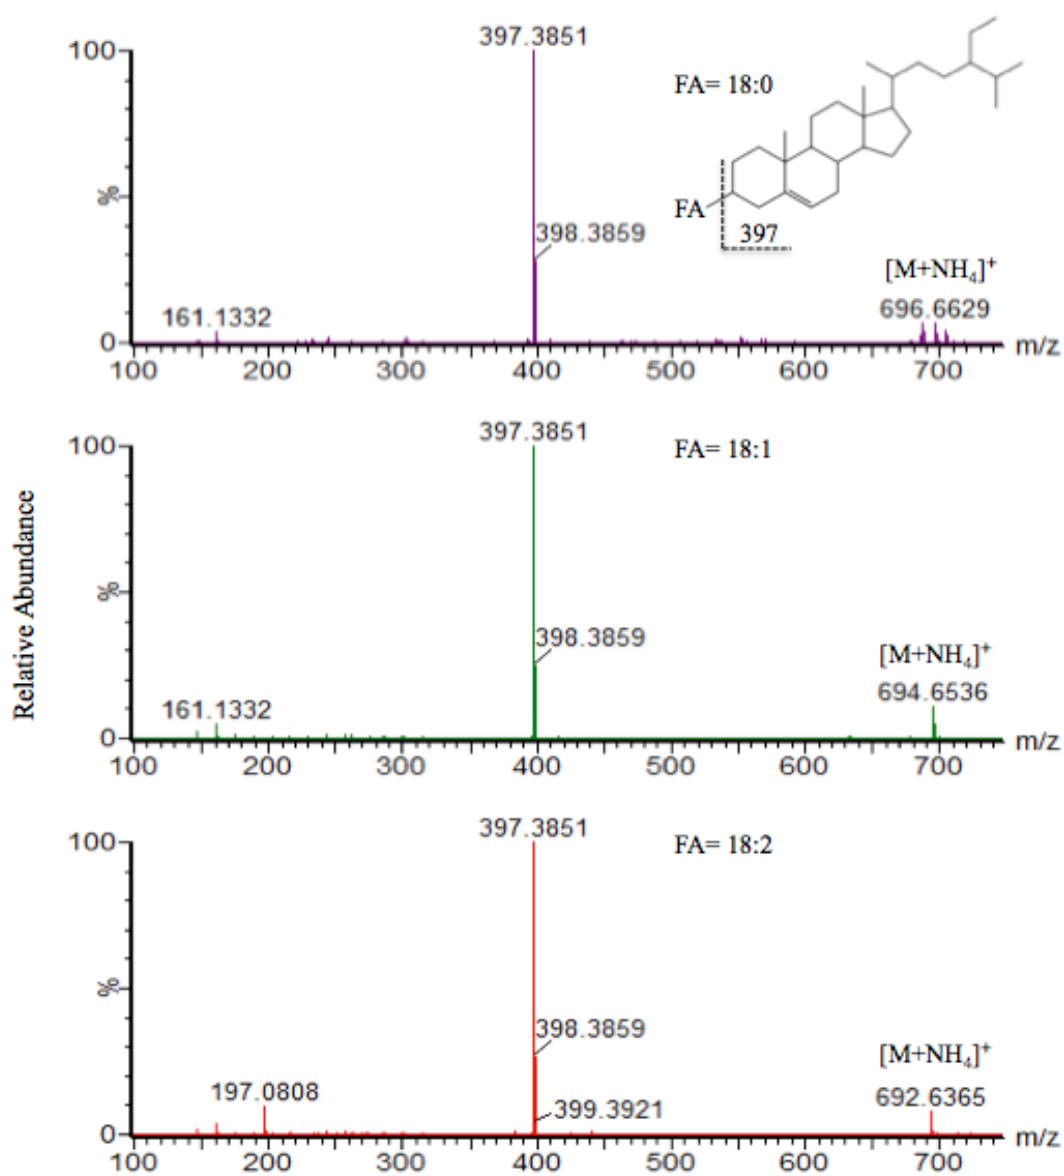

**Figure S12.** MS spectra of sitosterol esters: 18:0-sitosterol (top spectra), (B) 18:1-sitosterol (mid spectra), and 18:2-sitosterol (bottom spectra) in bilberry extract.

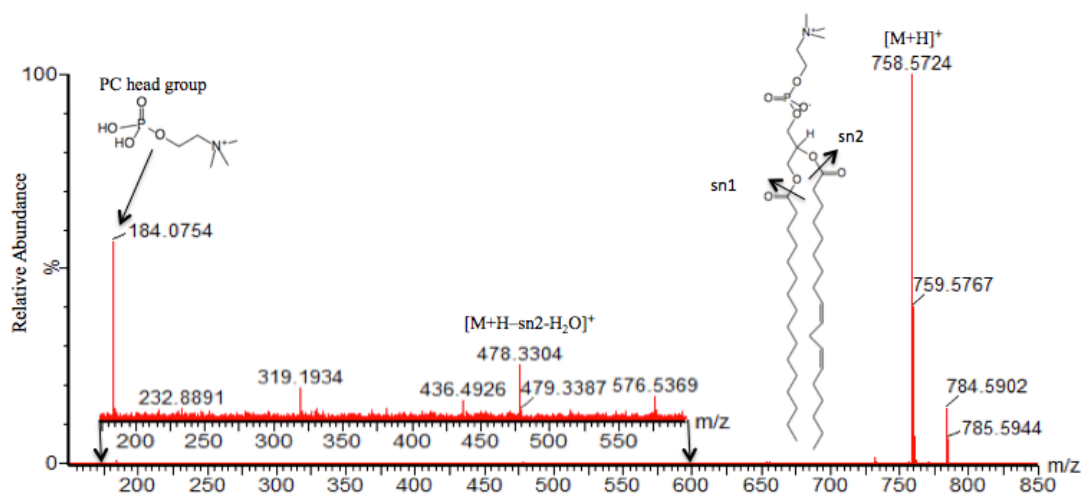

**Figure S13.** MS spectra of phosphatidylcholine (16:0/18:2) in bilberry extract.

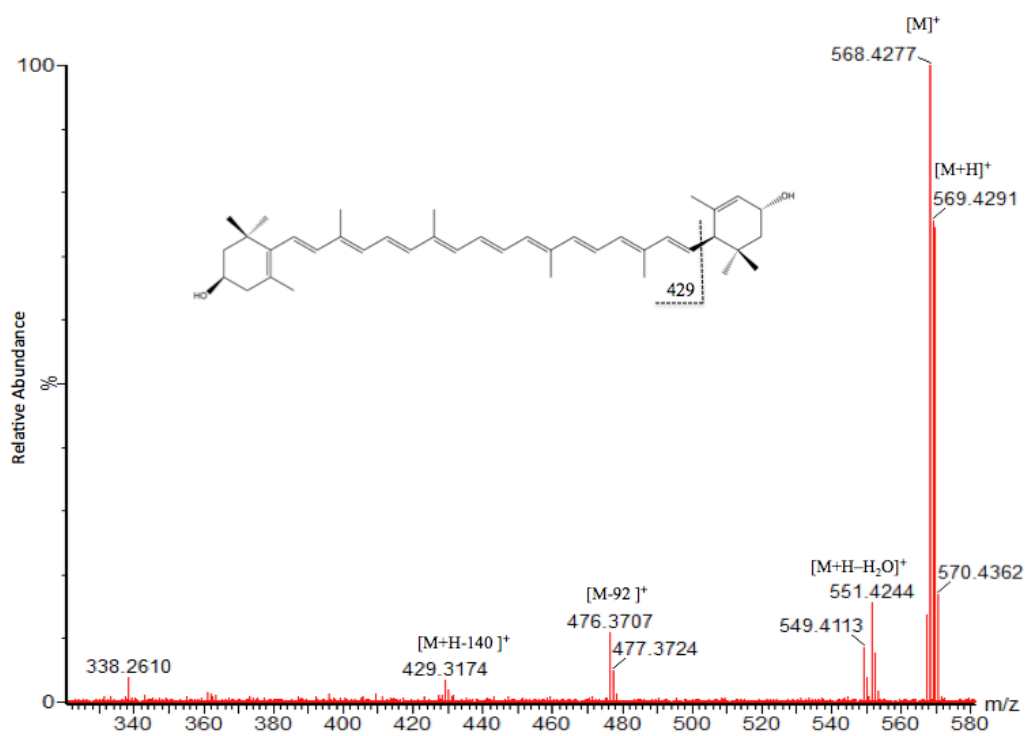

**Figure S14.** MS spectra of lutein in bilberry extract.
